# Supplementary material for: The synthesis, structure and reactivity of 4-nonafluorobiphenyl complexes
Source: Royal Society of Chemistry journal article supplement (doi:10.1039/b817252h), 2009-01-01
Supplement: b817252h.pdf [file b817252h.pdf]

## Supplementary Information

**Table S1:** Selected torsion angles relative to the “twist” between the two phenyl rings of each Ar<sub>F</sub><sup>1</sup> ligand.

| Compound  |                   | Torsion angle (°) <sup>*</sup> |                   | Torsion angle (°) <sup>*</sup> |                   | Torsion angle (°) <sup>*</sup> |
|-----------|-------------------|--------------------------------|-------------------|--------------------------------|-------------------|--------------------------------|
| <b>4</b>  | C13—C14—C141—C142 | 122.0(4)                       |                   |                                |                   |                                |
|           | C15—C14—C141—C146 | 116.1(4)                       |                   |                                |                   |                                |
| <b>4a</b> | C13—C14—C141—C146 | 124.0(3)                       |                   |                                |                   |                                |
|           | C15—C14—C141—C142 | 122.2(3)                       |                   |                                |                   |                                |
| <b>5</b>  | C13—C14—C141—C146 | 118.7(4)                       | C23—C24—C241—C246 | 122.8(4)                       |                   |                                |
|           | C15—C14—C141—C142 | 123.1(4)                       | C25—C24—C241—C242 | 123.1(4)                       |                   |                                |
| <b>6</b>  | C33—C34—C341—C346 | 119.6(3)                       |                   |                                |                   |                                |
|           | C35—C34—C341—C342 | 126.3(3)                       |                   |                                |                   |                                |
| <b>7</b>  | C13—C14—C141—C146 | 114.3(4)                       | C23—C24—C241—C246 | 112.8(4)                       | C33—C34—C341—C346 | 123.5(4)                       |
|           | C15—C14—C141—C142 | 116.1(5)                       | C25—C24—C241—C242 | 113.4(4)                       | C35—C34—C341—C342 | 126.2(4)                       |
| <b>9</b>  | C13—C14—C141—C146 | 118.9(5)                       |                   |                                |                   |                                |
|           | C15—C14—C141—C142 | 118.5(5)                       |                   |                                |                   |                                |
| <b>10</b> | C13—C14—C141—C142 | 111.0(7)                       |                   |                                |                   |                                |
|           | C15—C14—C141—C146 | 109.4(7)                       |                   |                                |                   |                                |

\* Strictly, the modulus of the torsion angle.
